# Supplementary material
Source: Springer Nature journal article supplement (https://www.springermedizin.de/resource/supplementary/12883_2010_384_MOESM1_ESM.pdf/9455032)

## EI by lesion location

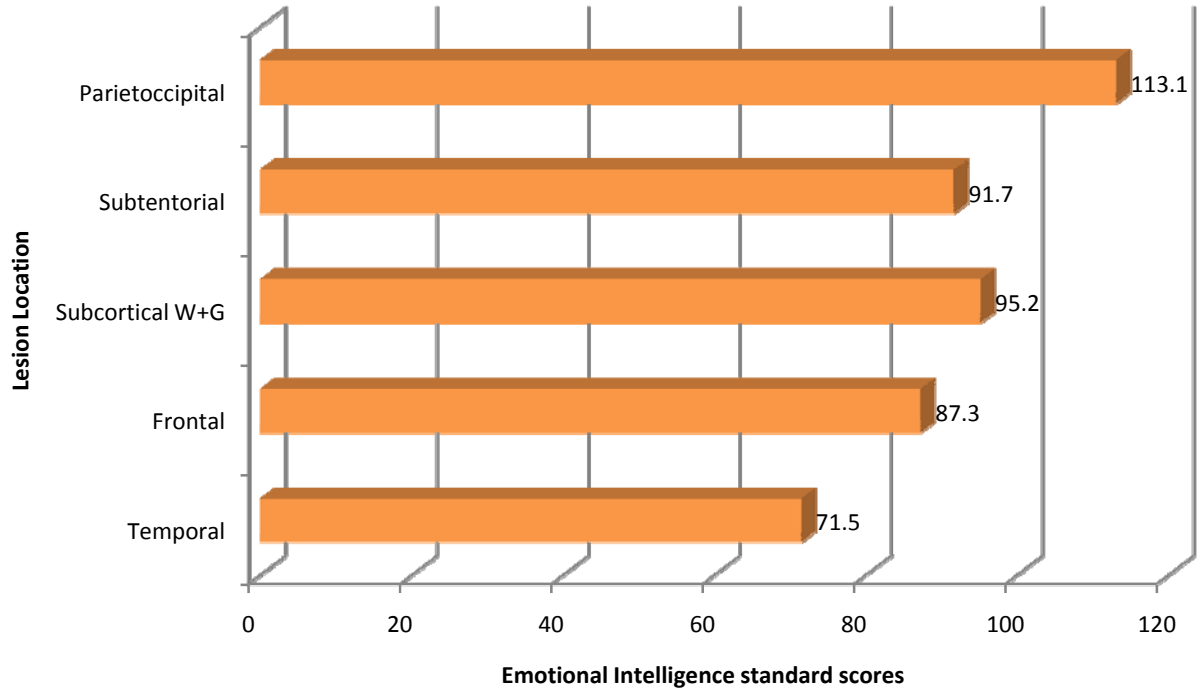

Supplement: MOESM1 [file 9455032]
